# Dysregulated Oscillatory Connectivity in the Visual System in Autism Spectrum Disorder

Seymour, R.A<sup>1,2,3</sup>., Rippon, G<sup>1</sup>., Gooding-Williams, G<sup>1</sup>.,  
Schoffelen, J.M<sup>4</sup> & Kessler, K<sup>1</sup>.

<sup>1</sup>Aston Brain Centre, School of Life and Health Sciences, Aston University,  
Birmingham, B4 7ET. <sup>2</sup>ARC Centre of Excellence in Cognition and Its Disorders,  
Macquarie University, Sydney, Australia, 2109. <sup>3</sup>Department of Cognitive Science,  
Macquarie University, Sydney, Australia, 2109. <sup>4</sup>Radboud University Nijmegen,  
Donders Institute for Brain, Cognition and Behaviour, Centre for Cognitive  
Neuroimaging, The Netherlands.

**Correspondence:** Klaus Kessler ([k.kessler@aston.ac.uk](mailto:k.kessler@aston.ac.uk))  
Robert Seymour ([seymourr@aston.ac.uk](mailto:seymourr@aston.ac.uk))

**Running Title:** Visual Oscillations are Dysregulated in Autism

**Keywords:** ASD; visual system; gamma; alpha; phase-amplitude  
coupling; Granger causality connectivity

## 23 Abstract

24 Autism Spectrum Disorder (ASD) is increasingly associated with atypical perceptual  
25 and sensory symptoms. Here we explore the hypothesis that aberrant sensory  
26 processing in ASD could be linked to atypical intra- (local) and inter-regional (global)  
27 brain connectivity. To elucidate oscillatory dynamics and connectivity in the visual  
28 domain we used magnetoencephalography (MEG) and a simple visual grating  
29 paradigm with a group of 18 adolescent autistic participants and 18 typically  
30 developing controls. Both groups showed similar increases in gamma (40-80Hz) and  
31 decreases in alpha (8-13Hz) frequency power in occipital cortex. However,  
32 systematic group differences emerged when analysing local and global connectivity  
33 in detail. Firstly, directed connectivity was estimated using non-parametric Granger  
34 causality between visual areas V1 and V4. Feedforward V1-to-V4 connectivity,  
35 mediated by gamma oscillations, was equivalent between ASD and control groups,  
36 but importantly, feedback V4-to-V1 connectivity, mediated by alpha (8-14Hz)  
37 oscillations, was significantly reduced in the ASD group. This reduction was  
38 correlated with autistic traits, indicating an atypical visual hierarchy in autism, with  
39 reduced top-down modulation of visual input via alpha-band oscillations. Secondly,  
40 at the local level in V1, coupling of alpha-phase to gamma amplitude (alpha-gamma  
41 PAC) was reduced in the ASD group. This implies dysregulated local visual  
42 processing, with gamma oscillations decoupled from patterns of wider alpha-band  
43 phase synchrony, possibly due to an excitation-inhibition imbalance. More generally,  
44 these results are in agreement with predictive coding accounts of neurotypical  
45 perception and indicate that visual processes in autism are less modulated by  
46 contextual feedback information.

47

## 48 Introduction

49 Autism Spectrum Disorder (ASD) is a neurodevelopmental condition, characterised  
50 by impairments in social interaction, communication and repetitive behaviours (1).  
51 Although these features remain the primary diagnostic markers of ASD, the  
52 presence of sensory symptoms have recently been given a more central role,  
53 consistent with reports that over 90% of ASD individuals experience hyper- and/or  
54 hypo-sensitive responses during sensory perception (2). Alterations to low-level  
55 sensory systems may also contribute to atypical developmental trajectories of  
56 higher-level cognitive functions in autism (3). An understanding of the neural circuits  
57 involved will therefore prove fruitful for ASD research, and could even provide early  
58 diagnostic markers (4, 5).

59

60 Dysregulated neural oscillations – rhythmical changes in neural activity – are a  
61 promising neural correlate of atypical sensory processing in autism. Early  
62 electrophysiological work suggested that autistic-style perception was linked with  
63 increased gamma band power (>30Hz) in response to illusory figures and faces (6,  
64 7). This was interpreted as an inability to synchronise visual responses at gamma  
65 frequencies, and bind perceptual processes into a coherent whole (8). Within the  
66 alpha-band (8-13Hz), reduced oscillatory synchronisation has been reported (9),  
67 which could reflect an inability to regulate widespread inhibitory processes and  
68 modulate sensory perception (4, 10). However, findings regarding differences in  
69 gamma and alpha-band power in autism, remain inconclusive overall, with both  
70 increases and decreases reported (reviewed in (4, 10). We suggest that these

71 inconsistencies might be reconciled by shifting the focus from oscillatory power  
72 towards considering the oscillation-mediated functional connectivity at the global and  
73 local scales (4, 10).

74  
75 Functional connectivity has been proposed as a unifying framework for autism, with  
76 the predominant theory emerging from fMRI data being a global reduction but local  
77 increase in connectivity (11, 12). Recent M/EEG research has supported the first of  
78 these claims with reductions in global connectivity during set-shifting, slit-viewing,  
79 face processing and whole-brain resting state studies (13–16). These reductions in  
80 connectivity are generally tied to feedback processes, located within the frontal  
81 lobes, and mediated by oscillations in theta (3-6Hz), alpha (8-13Hz) and beta-bands  
82 (13-30Hz). Interestingly, a recent study showed that during somatosensory  
83 stimulation, feedforward connectivity from primary to secondary somatosensory  
84 cortex is increased in ASD (17). This suggests that feedforward pathways in the  
85 autistic brain may be over-compensating for the lack of feedback connectivity. At the  
86 local level, M/EEG studies have not supported the local increase in connectivity  
87 reported using fMRI (18). An emerging biologically-relevant proxy for local  
88 connectivity is the coupling of oscillations from different frequency-bands, termed  
89 cross-frequency coupling (19, 20). In particular, phase-amplitude coupling (PAC) has  
90 been proposed to act as a mechanism for the dynamic co-ordination of brain activity  
91 over multiple spatial scales, with the amplitude of high-frequency activity within local  
92 ensembles coupled to large-scale patterns of low-frequency phase synchrony (21).  
93 Alpha-gamma PAC is also closely tied to the balance between excitatory and  
94 inhibitory (E-I) populations of neurons (22), which is affected in autism (23). One  
95 previous study has reported dysregulated alpha-gamma PAC in the fusiform face  
96 area during emotional face processing in autistic adolescents (14). Local PAC was  
97 also related to patterns of global alpha hypoconnectivity in autism, suggesting that  
98 local and global connectivity are concurrently affected. Altogether, oscillation-based  
99 functional connectivity in autism is characterised by local dysregulation and global  
100 hypoconnectivity (4).

101  
102 Within the context of visual processing, this view leads to several hypotheses,  
103 outlined in (4). Electrocorticography (ECoG) recordings in macaques and MEG in  
104 humans have shown that visual oscillations in different frequency bands have distinct  
105 cortical communication profiles. Gamma-band oscillations pass information up the  
106 visual hierarchy, in a feedforward manner, whereas alpha and beta-band oscillations  
107 mediate feedback connectivity, down the cortical hierarchy (24, 25). Long-range  
108 alpha/beta connectivity has also been linked with top-down attentional processes  
109 during visual perception via the regulation of local gamma oscillations (26, 27) and of  
110 local alpha-gamma PAC (28). If autism is associated with alterations in directed  
111 functional connectivity (17), we hypothesise reduced feedback connectivity within the  
112 visual system, mediated by oscillations in the alpha band, but potentially increased  
113 feedforward connectivity in the gamma band (4). At the local level, neurotypical  
114 visual processing is accompanied by increases in alpha-gamma PAC, thought to  
115 arise through the E-I coupling between infragranular and supragranular layers of  
116 visual cortex (29). Given an E-I imbalance in autism and reported local dysregulation  
117 of cortical activity, we hypothesise reduced alpha-gamma PAC within primary visual  
118 cortex (4, 14). Finally, if top-down alpha connectivity has a modulatory effect on  
119 bottom-up processing, then local alpha oscillations and alpha-gamma PAC, e.g. in  
120 V1, should reveal a systematic relationship with top-down alpha connectivity, e.g.

121 from V4 (14). However this may present itself differently between groups, with a  
122 more variable relationship between feedback connectivity and local PAC in the ASD  
123 group (30).

124  
125 We tested these hypotheses using MEG, which combines excellent temporal  
126 resolution with sophisticated source localisation techniques (31, 32). A group of 18  
127 adolescent ASD participants and 18 typically developing controls performed an  
128 engaging visual task, to induce alpha and gamma oscillations. We characterised  
129 changes in power and connectivity between visual areas V1 and V4: two regions  
130 with strong hierarchical connectivity (33). Additionally, we quantified local alpha-  
131 gamma PAC for V1 (20).

132

## 133 **Methods and Materials**

134

### 135 **Participants**

136 Data were collected from 18 participants diagnosed with ASD and 18 age-matched  
137 typically developing controls, see Table 1. ASD participants had a confirmed clinical  
138 diagnosis of ASD or Asperger's syndrome from a paediatric psychiatrist. Participants  
139 were excluded if they were taking psychiatric medication or reported epileptic  
140 symptoms. Control participants were excluded if a sibling or parent was diagnosed  
141 with ASD. Data from a further 9 participants were excluded, see *Supplementary*  
142 *Methods*.

143

---

|                | <u>N</u> | <u>Age</u> | <u>Male/Female</u>   | <u>Autism</u><br><u>Quotient</u><br><u>(Adult)</u> | <u>Raven</u><br><u>Matrices</u><br><u>Score</u> | <u>Glasgow</u><br><u>Sensory</u><br><u>Score</u> | <u>Mind in</u><br><u>the Eyes</u><br><u>Score</u> |
|----------------|----------|------------|----------------------|----------------------------------------------------|-------------------------------------------------|--------------------------------------------------|---------------------------------------------------|
| <b>ASD</b>     | 18       | 16.67      | 14 male; 4<br>female | 32.6*                                              | 43.8                                            | 65.3*                                            | 21.8                                              |
| <b>Control</b> | 18       | 16.89      | 15 male; 3<br>female | 10.9                                               | 48.7                                            | 38.7                                             | 25.4                                              |

---

144

145 *Table 1:* Participant demographic and behavioural data. \* = behavioural scores  
146 significantly greater in ASD>control group, t-test, p<.05.

147

### 148 **Experimental Procedures**

149 Experimental procedures complied with the Declaration of Helsinki and were  
150 approved by Aston University, ethics committee. Participants and a parent/guardian  
151 gave written informed consent.

152

### 153 **Behavioural Assessments**

154 General non-verbal intelligence was assessed using the Raven's Matrices Task (34).  
155 The severity of autistic traits was assessed using the Autism Quotient (AQ) and  
156 sensory traits using the Glasgow Sensory Questionnaire (GSQ) (35). AQ and GSQ  
157 scores were significantly higher in the ASD group (Table 1). Participants also  
158 completed the Mind in the Eyes test (36), however, there were no group differences.  
159 The Mind in the Eyes test has been criticised for measuring emotion recognition  
160 rather than an autism-specific deficit in mental state attribution (37), and therefore  
161 these scores were not analysed further.



162  
163  
164  
165  
166  
167  
168  
169  
170  
171  
172  
173  
174  
175  
176  
177  
178  
179  
180  
181  
182  
183  
184  
185  
186  
187  
188  
189  
190  
191  
192  
193  
194  
195  
196  
197  
198  
199  
200  
201  
202  
203  
204  
205  
206  
207  
208  
209  
210  
211

## **Paradigm**

Whilst undergoing MEG, participants performed a sensory task (Figure 1A), designed to elicit gamma-band oscillations. Each trial started with a randomised fixation period (1.5, 2.5 or 3.5s), followed by the presentation of a visual grating or auditory binaural click train stimulus; however only visual data will be analysed in this article. The visual grating had a spatial frequency of 2 cycles/degree and was presented for 1.5s. To promote task engagement, cartoon pictures of aliens or astronauts were presented after the visual grating, for 0.5s but did not form part of the MEG analysis. Participants were instructed to respond to the appearance of an alien picture using a response pad (maximum response period of 1.5s). The accuracy of the response was conveyed through audio-visual feedback, followed by a 0.5s fixation period. MEG recordings lasted 12-13 minutes and included 64 trials with visual grating stimuli. Accuracy rates were above 95% for all participants.

## **MEG and MRI Acquisition.**

MEG data were acquired using a 306-channel Neuromag MEG device (Vectorview, Elekta, Finland). A structural T1 brain scan was acquired for source reconstruction using a Siemens MAGNETOM Trio 3T scanner. MEG sensors were co-registered with anatomical MRI data by matching the digitised head-shape data with surface data from the structural scan (38). For each participant, a cortical mesh was constructed using Freesurfer v5.3 (39), and registered to a standard fs\_LR mesh (Van Essen 2012). For more detailed instructions, see *Supplementary Methods*.

## **MEG Pre-Processing**

MEG data were pre-processed using Maxfilter (tSSS, .9 correlation), which suppresses external sources of noise (41). Further pre-processing was performed in Matlab 2014b using the Fieldtrip toolbox v20161024 (42). Data were band-pass filtered (0.5-250Hz, Butterworth filter) and band-stop filtered (49.5-50.5Hz; 99.5-100.5Hz) to remove power-line contamination and harmonics. Data were epoched into segments of 4s (1.5s pre, 1.5s post stimulus onset, with  $\pm 0.5$ s padding), demeaned and detrended. Trials containing artefacts (SQUID jumps, eye-blinks, head movement, muscle) were removed if the trial-by-channel magnetometer variance exceeded  $8 \times 10^{-23}$ , resulting in removal of 3.1 trials on average per participant. Four noisy MEG channels were removed from all analyses.

## **Source-Level Power**

Source analysis was conducted using a linearly constrained minimum variance beamformer (32), which applies a spatial filter to the MEG data at each vertex of the cortical mesh. Due to differences in noise between sensor-types, covariance matrix terms resulting from multiplying magnetometer and gradiometer data were removed. Beamformer weights were calculated by combining this covariance matrix with leadfield information, with data pooled across baseline and grating periods. Following tSSS, sensor-level data had a rank 64 or below, and therefore a regularisation parameter of lambda 5% was applied. Data were band-pass filtered between 40-80Hz (gamma) and 8-13Hz (alpha), and source analysis was performed separately. To capture induced rather than evoked visual power, a period of 0.3-1.5s following stimulus onset was compared with a 1.2s baseline period (1.5-0.3s before grating onset).

## 212 **ROI definition**

213 To quantify directed connectivity within the visual system, we selected two regions of  
214 interest (ROI): visual area 1 (V1) and visual area 4 (V4), defined using HCP-MMP  
215 1.0 atlas (43) (Figure 1C). Both regions show stimulus-related changes in oscillatory  
216 power (Figure 1E-F) and demonstrate reliable patterns of hierarchical connectivity:  
217 V1-to-V4 connectivity is feedforward; whereas V4-to-V1 connectivity is feedback (24,  
218 25, 33). 12 vertices from posterior V1 were excluded to ensure clear anatomical  
219 separation of the ROIs. To obtain a single spatial filter for each ROI, we performed a  
220 principal components analysis on the concatenated filters encompassing V1 and V4,  
221 multiplied by the sensor-level covariance matrix, and extracted the first component  
222 (44). Broadband (0.5-250Hz) sensor-level data was multiplied by this spatial filter to  
223 obtain “virtual electrodes”. Finally, the change in oscillatory power between grating  
224 and baseline periods was calculated using multi-tapers (45) from 1-140Hz, 0.5s time  
225 window, sliding in steps of 0.02s and  $\pm 8$ Hz frequency smoothing.

226

## 227 **V1-V4 Directed Connectivity**

228 To quantify V1-V4 directed functional connectivity, we used a spectrally resolved  
229 non-parametric version of Granger Causality (GC) – a statistical technique which  
230 measures the extent to which one time series can predict another (46, 47). Data from  
231 V1 and V4 (0.3-0.1.5s post-stimulus onset) were split into 0.4s epochs to enhance  
232 the accuracy of results, Fourier transformed (Hanning taper; 2Hz smoothing), and  
233 entered into a non-parametric spectral matrix factorisation procedure. GC was then  
234 estimated between 1-140Hz for each ROI pair and averaged across hemispheres.  
235 Scrambled time-series with the same spectral properties as V1/V4 were created for  
236 comparison, modelled using the first autoregressive coefficient (48), and the above  
237 steps were repeated.

238

239 Asymmetries in GC values were quantified using a Directed Asymmetry Index (DAI),  
240 see below (24).

241

$$DAI = \frac{GC(V1 \rightarrow V4) - GC(V4 \rightarrow V1)}{GC(V1 \rightarrow V4) + GC(V4 \rightarrow V1)}$$

242

243

244 This results in normalised values (-1 to +1) for every frequency bin, with values  
245 above 0 indicating feedforward GC influence and values below 0 indicating feedback  
246 influence. DAI values were statistically compared between groups.

247

## 248 **Phase-Amplitude Coupling (PAC)**

249 V1 time courses were examined for changes in alpha-gamma PAC. For detailed  
250 discussion about PAC computation and methodological issues see (20). Briefly, we  
251 calculated PAC between 7-13Hz phase (1Hz steps) and amplitudes 34-100Hz (in  
252 2Hz steps), from 0.3-1.5s post-grating presentation. PAC values were corrected  
253 using 1.2 of data from the baseline period. This resulted in 33\*7 amplitude-phase  
254 comodulograms, which were statistically compared between groups (49).

255

256 To calculate PAC values, we used a mean vector length approach (50), see  
257 *Supplementary Methods*, based on our previous study which compared the efficacy  
258 of four different PAC algorithms (20). We repeated the analysis with a phase-locking  
259 value approach (51), see Figure S3. Code used for PAC computation is available at:  
260 [https://github.com/neurofractal/sensory\\_PAC](https://github.com/neurofractal/sensory_PAC).

261  
262  
263  
264  
265  
266  
267  
268  
269  
270  
271

## Statistical Analysis

Statistical analysis was performed using cluster-based permutation tests (49), which consist of two parts: first an independent-samples t-test is performed, and values exceeding an uncorrected 5% significance threshold are grouped into clusters. The maximum t-value within each cluster is carried forward. Second, a null distribution is obtained by randomising the condition label (e.g. ASD/control) 1000 times and calculating the largest cluster-level t-value for each permutation. The maximum t-value within each original cluster is then compared against this null distribution, and the null hypothesis is rejected if the test statistic exceeds a threshold of  $p < .05$ .

## Results

### Oscillatory Power

The change in oscillatory power following presentation of the visual grating was calculated on a cortical mesh for the alpha (8-13Hz) and gamma (40-80Hz) bands. For both ASD and control groups there was a statistically significant increase in gamma power (Figure 1B) and a decrease in alpha power (Figure 1C), localised to the ventral occipital cortex. This replicates previous MEG/EEG studies using visual grating stimuli (25, 45, 52). Interestingly, there were no significant differences in gamma or alpha power between groups ( $p > .05$ , Figure S1).

Two regions of interest (ROI) were defined in V1 and V4 (Figure 1D). Changes in oscillatory power from V1 (Figure 1E) and V4 (Figure 1F) showed characteristic increases in gamma-band power (40-80Hz) and decreases in alpha/beta power (8-20Hz). Between groups, there were minor differences between the power spectra, including a larger alpha/beta induced power change for the ASD group (Fig 2E, 2F, purple line), however none of these differences was significant (both  $p > .05$ ).

272  
273  
274  
275  
276  
277  
278  
279  
280  
281  
282  
283  
284  
285  
286  
287  
288  
289

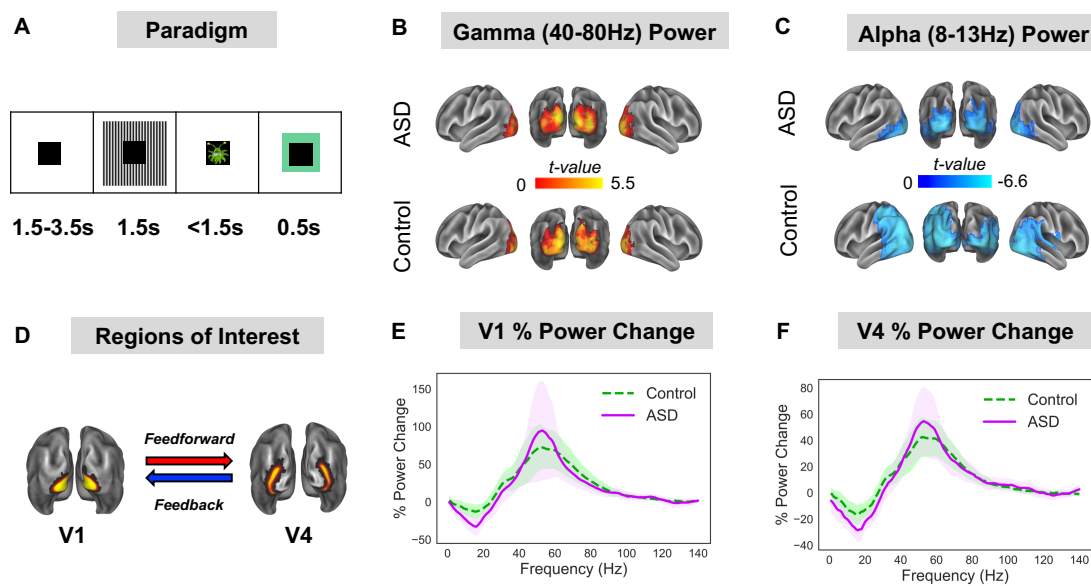

290  
291  
292

**Figure 1: (A) Participants performed a visual task, consisting of 1.5-3.5 baseline period followed by 1.5s presentation of a visual grating. After the**

293 **grating, participants were presented with a cartoon alien or astronaut picture**  
294 **and instructed to only respond when an alien was presented (response time**  
295 **up to 1.5s). The alien/astronaut stimuli were to maintain attention and do not**  
296 **form part of the analysis. (B-C) The change in oscillatory power between**  
297 **grating and baseline periods was localised on a cortical mesh, and masked to**  
298 **show only statistically significant ( $p < .05$ , corrected) stimulus induced**  
299 **increases in gamma (40-80Hz) and decreases in alpha (8-13Hz) power. There**  
300 **were no statistically significant differences in gamma or alpha power between**  
301 **groups. (D) Regions of interest in V1 and V4 were defined using HCP-MMP 1.0**  
302 **atlas (43). (E-F) The change in power between grating and baseline periods**  
303 **was calculated for V1 and V4 from 1-140Hz. Results show characteristic**  
304 **reductions in alpha/beta power and increases in gamma-band power (40-80Hz)**  
305 **for V1 and V4. There were no statistically significant differences in power**  
306 **between groups. The shaded area around each curve indicates 95%**  
307 **confidence intervals.**

308

### 309 ***Feedforward / Feedback Connectivity***

310 The directed functional connectivity between V1-V4 was quantified using Granger  
311 Causality (GC). Across groups, all reported increases in bidirectional V1-V4 GC were  
312 greater than for scrambled data (Figure S2). For the control group (Figure 2A), V1-  
313 to-V4 (henceforth termed feedforward) connectivity showed a prominent increase  
314 from 40-80Hz in the gamma band. In contrast, V4-to-V1 (henceforth termed  
315 feedback) connectivity showed a prominent increase from 8-13Hz in the alpha band  
316 (Figure 2A). This dissociation between feedforward gamma and feedback alpha,  
317 replicates previous findings in macaques and humans (24, 25). The feedforward  
318 gamma-band peak (40-80Hz) was also evident in the ASD Granger spectra (Figure  
319 2B, red line). However, there was a reduction in the alpha-band feedback peak in the  
320 ASD group compared with controls (Figure 2B, blue line).

321

322 To quantify asymmetries in feedforward/feedback connectivity between groups, we  
323 calculated the directed asymmetry index (DAI, see *Materials and Methods*). The  
324 control group displayed a feedback peak from 0-20Hz (negative DAI values) and  
325 feedforward peak from 40-80Hz (positive DAI values). By statistically comparing DAI  
326 between groups, it was found that values from 8-14Hz were significantly lower  
327 ( $p = .032$ ) for the control group than the ASD group. All other frequencies, including  
328 gamma (40-80Hz) showed similar DAI values between groups. This suggests  
329 reduced V4-to-V1 feedback connectivity for the ASD group, mediated by alpha-band  
330 oscillations (8-14Hz), but typical V1-to-V4 feedforward connectivity mediated by  
331 gamma oscillations (40-80Hz).

332

333 There was no feedforward Granger causality peak in the theta-band (4-8Hz) for  
334 either the control or ASD group, as previously reported using ECoG (53). This could  
335 be due to lower sensitivity of MEG recordings (25), as well as the centrally-masked  
336 visual grating (Fig. 1A).

337

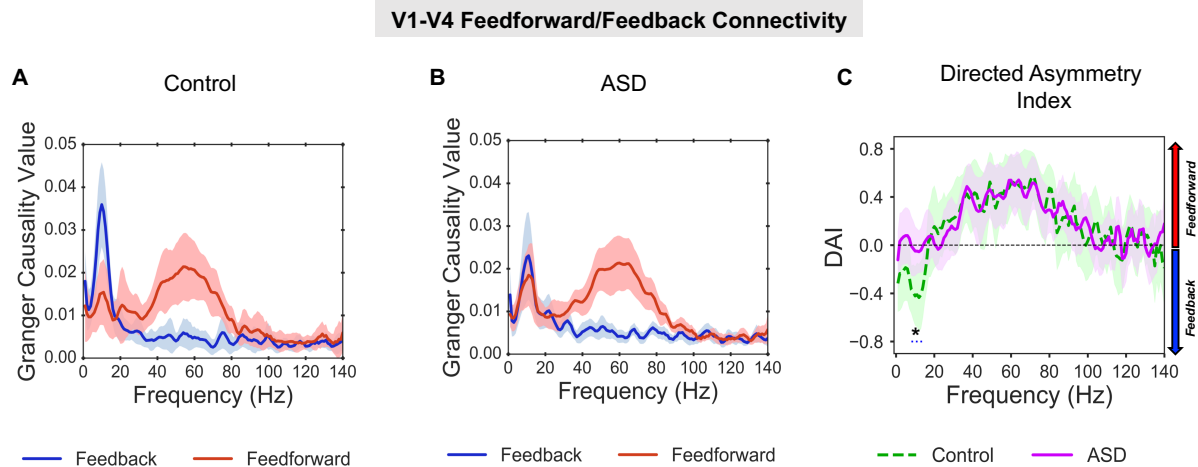

338  
339

340 **Figure 2. V1-V4 Feedforward/Feedback Connectivity. (A) For the control group**  
341 **there was a peak in granger causality (GC) values, in the gamma-band (40-**  
342 **80Hz, red line) for V1-to-V4 feedforward connectivity, and a peak in GC values**  
343 **in the alpha band (8-14Hz, blue line) for V4-to-V1 feedback connectivity. (B) For**  
344 **the ASD group there was also a peak in GC values in the gamma-band for V1-**  
345 **to-V4 feedforward connectivity, however there was smaller peak in GC in the**  
346 **alpha-band for V4-to-V1 feedback connectivity. (C) The difference between**  
347 **feedforward and feedback connectivity was quantified as the directed**  
348 **asymmetry index (DAI, see Material and Methods). The difference in DAI**  
349 **between control (dashed, green line) and ASD (solid, purple line) was**  
350 **significant ( $p=.036$ ), with lower DAI values ( $p=.036$ ) between 8-14Hz for the**  
351 **control group, suggesting reduced V4-to-V1 feedback connectivity in autism.**  
352 **The shaded area around each GC line indicates 95% confidence intervals.**

353

#### 354 ***Alpha-Gamma Phase Amplitude (PAC) in V1***

355 Activity from visual area V1 was examined for changes in alpha-gamma PAC.  
356 Frequency comodulograms showed increased PAC in the control group, peaking at  
357 8-10Hz phase frequencies and 50-70Hz amplitude frequencies (Figure 3A). These  
358 results replicate (20), who showed increased alpha-gamma PAC in an adult  
359 population using the same visual grating stimulus. The comodulograms for the ASD  
360 group display lower PAC values, with no clear positive peak (Figure 3B). Comparing  
361 control vs. ASD groups, there was a single positive cluster of greater PAC between  
362 8-9Hz and 52-74Hz ( $p=.029$ ). This suggests that the coupling between alpha and  
363 gamma oscillations in primary visual cortex, during perception, is reduced in autism.  
364 An alternative method for PAC computation, based on the phase locking value,  
365 produced similar comodulograms (Figure S3).

366



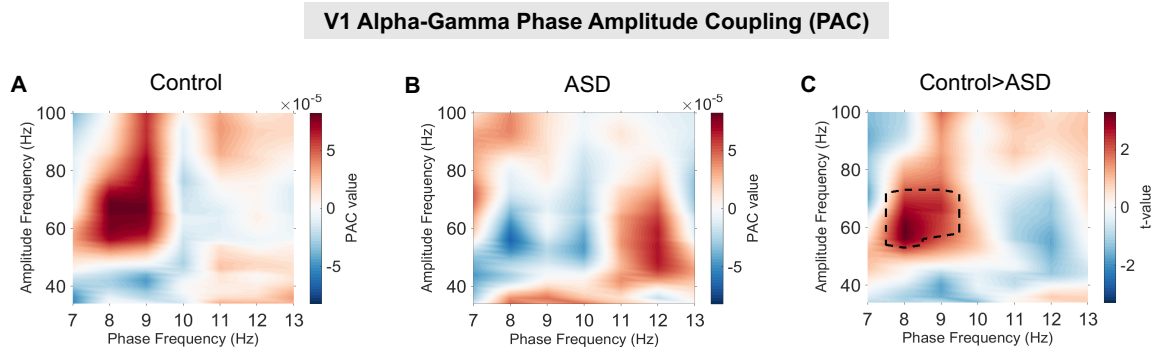

367  
368  
369  
370  
371  
372  
373  
374  
375

**Figure 3. V1 Phase Amplitude Coupling. (A) The control group showed increased alpha-gamma PAC compared with baseline, with a peak between 50-80Hz amplitude and 7-9Hz phase. (B) The ASD group showed less prominent increases in PAC with a much smaller peak from 40-70Hz amplitude and 11-13Hz phase. (C) Statistical comparison of control>ASD indicated significantly larger PAC for the control group ( $p=.029$ ) from 54-72Hz amplitude and 8-9Hz phase.**

376

#### **Feedback - PAC Correlation**

377  
378  
379  
380  
381  
382  
383  
384  
385  
386  
387  
388  
389  
390

To investigate the relationship between feedback and local processing, we ran an exploratory correlation analysis between alpha-band feedback connectivity (DAI 7-13Hz) and V1 PAC. Pooling the data from both subject groups there was a negative correlation between 9Hz DAI and 8Hz PAC, (Figure 4, Pearson's  $r = -.35$ ,  $p = .034$ , uncorrected for multiple comparisons across the cross-correlation matrix) suggesting that increased V4-to-V1 feedback connectivity is related to greater local PAC in V1. Upon closer inspection, the two groups contributed quite differently to the correlation. The majority of control participants are located in the top-left quadrant of Fig. 4B, whereas the majority of ASD participants were outside this top-left quadrant. The frequency distribution across the four quadrants was significantly different between the two groups as revealed by a further Chi-Square test ( $\text{chisq}=7.99$ ;  $p=.046$ ), differing most strongly in the top-left (control: 13; ASD: 5) and bottom-right (control: 1; ASD: 6) quadrants.



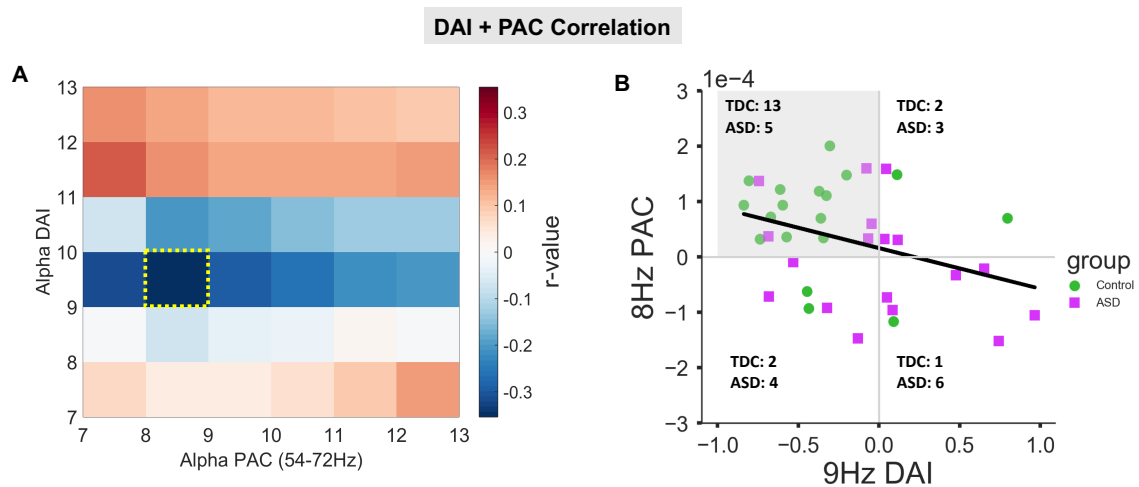

391  
 392 **Figure 4. (A) To investigate the correlation between feedback connectivity and**  
 393 **PAC, a cross correlation matrix was calculated in 1Hz steps between ASD and**  
 394 **control participant's alpha PAC, averaged between 54-72Hz, and 7-13Hz**  
 395 **directed asymmetry index (DAI). This produced a negative correlation peak,**  
 396 **shown with yellow box, at 8Hz PAC, 9Hz DAI. (B) The correlation between 8Hz**  
 397 **PAC, 9Hz DAI is negative across both groups (Pearson's  $r = -.35$ ,  $p = .034$ ).**  
 398 **Note that only the top-left quadrant reflects the relationship postulated for**  
 399 **effective processing: feedback alpha in form of negative DAI values (x-axis)**  
 400 **paired up with positive PAC values (y-axis). 13 out of 18 control participants**  
 401 **but only 5 out of 18 ASD participants are located in this quadrant (frequencies**  
 402 **per group are indicated for each quadrant). Further explanations in text.**

403  
 404 ***Connectivity - Behaviour Correlation***

405 Behavioural ASD data from the Autism Quotient (AQ) and Glasgow Sensory  
 406 Questionnaires (GSQ) were correlated with group differences in alpha-band DAI and  
 407 alpha-gamma PAC (Figure 5). There was a significant positive correlation between  
 408 AQ score and alpha DAI (Figure 5B,  $r = .526$ ,  $p = .025$ ) suggesting that increased V4-  
 409 to-V1 feedback connectivity (negative DAI values) is related to lower levels of autistic  
 410 traits (lower AQ scores). There were no other significant correlations for the GSQ or  
 411 PAC.

412

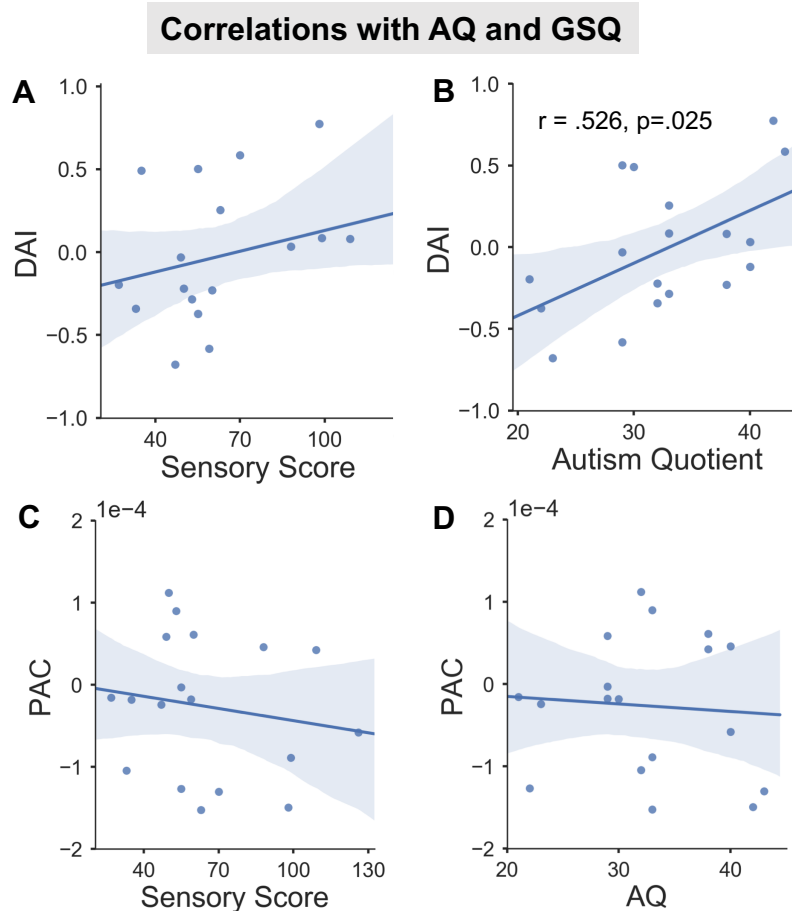

413  
 414 **Figure 5: For the ASD group, the correlation between alpha-band DAI (A-B),**  
 415 **alpha-gamma PAC (C-D) and Autism Quotient (B,D), Glasgow Sensory Score**  
 416 **(A,C) was plotted with regression line (95% confidence interval indicated by**  
 417 **shaded region). (B) There was a positive correlation between DAI and AQ**  
 418 **score.**  
 419

## 420 Discussion

421 This study examined the oscillation-based functional connectivity within the visual  
 422 system of autistic adolescents and typically developing age-matched controls.  
 423 Confirming our hypotheses (4), we found a reduction in alpha-band (8-14Hz)  
 424 feedback connectivity from V4-to-V1 in the ASD group, which was positively  
 425 correlated with autistic traits. Additionally, there was a reduction in the coupling  
 426 between alpha and gamma oscillations in V1, measured via PAC, suggesting  
 427 dysregulation of local connectivity in autism.

### 428 **Feedback / Feedforward Connectivity**

429 The reduction in feedback connectivity is consistent with previous MEG and fMRI  
 430 studies showing a reduction in global connectivity in autism (12, 14, 15). In this  
 431 instance, a simple visual paradigm showed that the reduction in connectivity was  
 432 specific to alpha-band oscillations from 8-14Hz (Figure 2). Alpha oscillations underlie  
 433 the functional inhibition and disengagement of task-irrelevant brain regions,  
 434

435 promoting information flow through precise timing of neural activity (26). Posterior  
436 alpha-band activity is also a mechanism for top-down modulation of perceptual  
437 processes, linked with spatial attention and phase-locking with wider frontoparietal  
438 control networks (54, 55). Our data suggest that in autism, whilst alpha power is  
439 unaffected, the feedback flow of information from higher to lower visual regions is  
440 reduced. An inability to implement top-down modulation of bottom-up visual  
441 information, may result in the atypical sensory processes reported by autistic  
442 persons and contribute to the severity of symptoms more generally (4, 10). In  
443 support of this, we found a correlation between the reduction in feedback  
444 connectivity and AQ score.

445  
446 Interestingly, we did not find an increase in connectivity from V1-to-V4 for the ASD  
447 group mediated by gamma oscillations, suggesting typical feedforward flow of visual  
448 information. Whilst Khan and colleagues reported increased feedforward connectivity  
449 in autism (17), they focussed on somatosensory rather than visual processing with a  
450 younger group of adolescent participants. In any case, we hypothesise that where  
451 perception can be achieved via feedforward processes (56), autistic participants will  
452 perform on par or even outperform their typically developing peers (57); for example  
453 during visual search tasks, where autistic participants perform faster than controls  
454 (58).

#### 455 **PAC**

457 Within primary visual cortex, there was a reduction in alpha-gamma PAC for the ASD  
458 group (Figure 3). Reduced alpha-gamma PAC in autism has previously been  
459 reported during emotional face perception in the fusiform gyrus (14), and during rest  
460 (59). This suggests that increases in local gamma power, driven by visual input, are  
461 decoupled from wider patterns of top-down alpha-band connectivity in autism. As  
462 PAC relies heavily on local inhibitory populations of neurons (60), a reduction in PAC  
463 is consistent with histological findings showing underdeveloped inhibitory  
464 interneurons (61), and an E-I imbalance in autism (23). Where local inhibitory  
465 processes are affected, this would manifest as high-frequency 'noisy' activity in the  
466 brain, common in ASD (61), and reduced signal-to-noise (23). It is important to note  
467 that the group differences in PAC arose despite similar changes in gamma and alpha  
468 power (Figure 1). Interestingly, one previous ASD study reported reduced global  
469 connectivity and local PAC despite similar event-related activity and oscillatory  
470 power between groups (14). Future studies should therefore explore the precise  
471 regulation of gamma oscillations via cross-frequency coupling, rather than relying on  
472 measures of power alone (4, 10).

473  
474 Dysregulated local activity could also have concomitant effects on establishing  
475 patterns of global connectivity in autism (62). Indeed, there was a correlation  
476 between feedback connectivity and the strength of PAC across groups (Figure 4),  
477 see (14). However, whilst the control group showed increased feedback alpha and  
478 increased alpha-gamma PAC, the relationship for the ASD group was much more  
479 variable (Figure 4B). This is consistent with recent findings suggesting that brain  
480 connectivity and evoked responses are idiosyncratic in autistic samples, perhaps  
481 reflecting atypical neurodevelopmental trajectories and dysregulated local activity  
482 (30, 63).

483

484 Interestingly, we did not find a relationship between AQ or GSQ and PAC in the ASD  
485 group (Figure 5D). In contrast, a recent study reported a correlation between Autism  
486 Diagnostic Observation Schedule (ADOS) social score and local PAC in an  
487 adolescent autistic sample (64), suggesting that PAC may be related to clinical  
488 features of autism rather than general autistic traits (see *Limitations*).

489

### 490 ***Neurocognitive Models of Perception in ASD***

491 More generally, our results link with emerging theories of perception in autism.  
492 Predictive-coding accounts of cortical activity describe the passage of top-down  
493 predictions from higher to lower areas via feedback pathways, with prediction errors  
494 computed at each level of the hierarchy being passed forward via feedforward  
495 pathways (65). Predictive-coding accounts of autism suggest that differences in  
496 perception emerge from fewer or hyper-precise top-down predictions, such that  
497 perception is less influenced by prior knowledge and contextual cues (66, 67). Our  
498 data clearly support this proposal by showing reduced feedback connectivity in the  
499 visual cortex in autism. This suggests that autistic perception can be characterised  
500 by differences in the hierarchical passage of information flow (66), captured through  
501 measures of oscillatory coupling. Where top-down information flow is reduced, this  
502 would force the perceptual system from predictive to reactive, with increased  
503 prediction error signalling and concomitant impacts on autistic symptoms (4). This is  
504 supported by the observed correlations between feedback connectivity and PAC  
505 (Figure 4) and feedback connectivity and AQ score (Figure 4B).

506

### 507 ***Clinical Implications, Limitations, and Future Work***

508 We note two limitations to this study. First, we did not collect a formal clinical  
509 assessment of autism, e.g. the ADOS. We therefore implemented strict participant  
510 exclusion criteria, only including autistic participants with a confirmed clinical  
511 diagnosis of ASD or Asperger's syndrome. Between groups, there were significant  
512 differences in autistic and sensory traits (Table 1). However, upon closer inspection  
513 of GSQ data, the ASD group showed a mixture of hyper- and hypo-sensitive traits  
514 between different sensory modalities making precise brain-behavioural correlations  
515 problematic (Figure S4). This may explain the lack of relationship between oscillatory  
516 connectivity and GSQ scores in autism (Figure 5A, C). Brain-behaviour relationships  
517 might be better assessed using psychophysical tests of visual perception (68),  
518 combined with formal clinical assessments. Second, we constrained our connectivity  
519 analyses to two regions of interest (V1, V4) located early in the visual system, due to  
520 their hierarchical connectivity, and the low-level nature of the visual grating stimulus.  
521 However, we may have missed the opportunity to characterise more complex  
522 feedforward-feedback relationships in wider visual cortex. Future work should  
523 therefore include more ROIs in combination with stimuli requiring participants to  
524 explicitly engage in feedback processing to constrain visual perception. This  
525 approach could be particularly useful with high-functioning individuals, and help  
526 characterise the neurophysiological basis of autistic perception (3, 4).

527

528 The current results indicate that measures of oscillatory connectivity within the visual  
529 system, can elucidate atypical neural mechanisms in the autistic brain. Future  
530 research should elaborate on the current work by assessing these connectivity  
531 measures for their potential as stratification biomarkers of ASD in high-powered  
532 longitudinal studies (69). Due to the simplicity of the employed stimulus, the  
533 paradigm presented here could even be used in paediatric or non-verbal

534 populations, since passive viewing of simple grating stimuli is sufficient for extracting  
535 the presented connectivity measures.

536

### 537 **Acknowledgments**

538 We wish to thank: the volunteers who gave their time to participate in this study; Dr.  
539 Shu Yau for help with MRI data acquisition; Dr. Jon Brock for intellectual  
540 contributions to experimental design; and the Wellcome Trust, Dr Hadwen Trust and  
541 Tommy's Fund for supporting research costs. Robert Seymour was supported by a  
542 cotutelle PhD studentship from Aston University and Macquarie University. Jan-  
543 Mathijs Schoffelen was supported by The Netherlands Organisation for Scientific  
544 Research (NWO Vidi: 864.14.011).

545

### 546 **References**

- 547 1. American Psychiatric Association (2013): Diagnostic and statistical manual of  
548 mental disorders. *Arlingt Am Psychiatr Publ.*
- 549 2. Leekam SR, Nieto C, Libby SJ, Wing L, Gould J (2007): Describing the sensory  
550 abnormalities of children and adults with autism. *J Autism Dev Disord.* 37:  
551 894–910.
- 552 3. Robertson CE, Baron-Cohen S (2017): Sensory perception in autism. *Nat Rev*  
553 *Neurosci.* 18: 671.
- 554 4. Kessler K, Seymour RA, Rippon G (2016): Brain oscillations and connectivity in  
555 autism spectrum disorders (ASD): new approaches to methodology,  
556 measurement and modelling. *Neurosci Biobehav Rev.* 71: 601–620.
- 557 5. Roberts TP, Khan SY, Rey M, Monroe JF, Cannon K, Blaskey L, *et al.* (2010):  
558 MEG detection of delayed auditory evoked responses in autism spectrum  
559 disorders: towards an imaging biomarker for autism. *Autism Res.* 3: 8–18.
- 560 6. Brown C, Gruber T, Boucher J, Rippon G, Brock J (2005): Gamma abnormalities  
561 during perception of illusory figures in autism. *Cortex.* 41: 364–376.
- 562 7. Sun L, Grützner C, Bölte S, Wibrat M, Tozman T, Schlitt S, *et al.* (2012): Impaired  
563 gamma-band activity during perceptual organization in adults with autism  
564 spectrum disorders: evidence for dysfunctional network activity in frontal-  
565 posterior cortices. *J Neurosci.* 32: 9563–9573.
- 566 8. Brock J, Brown CC, Boucher J, Rippon G (2002): The temporal binding deficit  
567 hypothesis of autism. *Dev Psychopathol.* 14: 209–224.
- 568 9. Milne E, Scope A, Pascalis O, Buckley D, Makeig S (2009): Independent  
569 Component Analysis Reveals Atypical Electroencephalographic Activity  
570 During Visual Perception in Individuals with Autism. *Biol Psychiatry,*  
571 *Perception, Empathy, and Reward in Attention-Deficit/Hyperactivity Disorder*  
572 *and Autism.* 65: 22–30.
- 573 10. Simon DM, Wallace MT (2016): Dysfunction of sensory oscillations in Autism  
574 Spectrum Disorder. *Neurosci Biobehav Rev.* 68: 848–861.
- 575 11. Courchesne E, Pierce K (2005): Why the frontal cortex in autism might be talking  
576 only to itself: local over-connectivity but long-distance disconnection. *Curr*  
577 *Opin Neurobiol.* 15: 225–230.
- 578 12. Hughes JR (2007): Autism: the first firm finding= underconnectivity? *Epilepsy*  
579 *Behav.* 11: 20–24.
- 580 13. Doesburg SM, Vidal J, Taylor MJ (2013): Reduced Theta Connectivity during  
581 Set-Shifting in Children with Autism. *Front Hum Neurosci.* 7.
- 582 14. Khan S, Gramfort A, Shetty NR, Kitzbichler MG, Ganesan S, Moran JM, *et al.*  
583 (2013): Local and long-range functional connectivity is reduced in concert in

- 584 autism spectrum disorders. *Proc Natl Acad Sci.* 110: 3107–3112.
- 585 15. Kitzbichler MG, Khan S, Ganesan S, Vangel MG, Herbert MR, Hämäläinen MS,  
586 Kenet T (2015): Altered Development and Multifaceted Band-Specific  
587 Abnormalities of Resting State Networks in Autism. *Biol Psychiatry, Autism*  
588 *Genotypes and Phenotypes.* 77: 794–804.
- 589 16. Peiker I, David N, Schneider TR, Nolte G, Schöttle D, Engel AK (2015):  
590 Perceptual Integration Deficits in Autism Spectrum Disorders Are Associated  
591 with Reduced Interhemispheric Gamma-Band Coherence. *J Neurosci.* 35:  
592 16352–16361.
- 593 17. Khan S, Michmizos K, Tommerdahl M, Ganesan S, Kitzbichler MG, Zetino M, *et*  
594 *al.* (2015): Somatosensory cortex functional connectivity abnormalities in  
595 autism show opposite trends, depending on direction and spatial scale. *Brain.*  
596 138: 1394-1409.
- 597 18. Keown CL, Shih P, Nair A, Peterson N, Mulvey ME, Müller R-A (2013): Local  
598 Functional Overconnectivity in Posterior Brain Regions Is Associated with  
599 Symptom Severity in Autism Spectrum Disorders. *Cell Rep.* 5: 567–572.
- 600 19. Canolty RT, Knight RT (2010): The functional role of cross-frequency coupling.  
601 *Trends Cogn Sci.* 14: 506–515.
- 602 20. Seymour RA, Rippon G, Kessler K (2017): The Detection of Phase Amplitude  
603 Coupling during Sensory Processing. *Front Neurosci.* 11: 487.
- 604 21. Bonnefond M, Kastner S, Jensen O (2017): Communication between Brain  
605 Areas Based on Nested Oscillations. *ENeuro.* 4: ENEURO–0153.
- 606 22. Mejias JF, Murray JD, Kennedy H, Wang X-J (2016): Feedforward and feedback  
607 frequency-dependent interactions in a large-scale laminar network of the  
608 primate cortex. *Sci Adv.* 2: e1601335.
- 609 23. Rubenstein JLR, Merzenich MM (2003): Model of autism: increased ratio of  
610 excitation/inhibition in key neural systems. *Genes Brain Behav.* 2: 255–267.
- 611 24. Bastos AM, Vezoli J, Bosman CA, Schoffelen J-M, Oostenveld R, Dowdall JR, *et*  
612 *al.* (2015): Visual Areas Exert Feedforward and Feedback Influences through  
613 Distinct Frequency Channels. *Neuron.* 85: 390–401.
- 614 25. Michalareas G, Vezoli J, Van Pelt S, Schoffelen J-M, Kennedy H, Fries P (2016):  
615 Alpha-beta and gamma rhythms subserve feedback and feedforward  
616 influences among human visual cortical areas. *Neuron.* 89: 384–397.
- 617 26. Klimesch W (2012): Alpha-band oscillations, attention, and controlled access to  
618 stored information. *Trends Cogn Sci.* 16: 606–617.
- 619 27. Richter CG, Thompson WH, Bosman CA, Fries P (2017): Top-down beta  
620 enhances bottom-up gamma. *J Neurosci.* 3771–16.
- 621 28. Chacko RV, Kim B, Jung SW, Daitch AL, Roland JL, Metcalf NV, *et al.* (2018):  
622 Distinct phase-amplitude couplings distinguish cognitive processes in human  
623 attention. *NeuroImage.* 175: 111–121.
- 624 29. Spaak E, Bonnefond M, Maier A, Leopold DA, Jensen O (2012): Layer-specific  
625 entrainment of gamma-band neural activity by the alpha rhythm in monkey  
626 visual cortex. *Curr Biol.* 22: 2313–2318.
- 627 30. Dinstein I, Heeger DJ, Lorenzi L, Minshew NJ, Malach R, Behrmann M (2012):  
628 Unreliable evoked responses in autism. *Neuron.* 75: 981–991.
- 629 31. Hillebrand A, Barnes GR (2005): Beamformer analysis of MEG data. *Int Rev*  
630 *Neurobiol.* 68: 149–171.
- 631 32. Bastos AM, Litvak V, Moran R, Bosman CA, Fries P, Friston KJ (2015): A DCM  
632 study of spectral asymmetries in feedforward and feedback connections  
633 between visual areas V1 and V4 in the monkey. *Neuroimage.* 108: 460–475.



- 634 33. Raven JC, Court JH (1998): *Raven's progressive matrices and vocabulary*  
635 *scales*. Oxford Psychologists Press Oxford, UK.
- 636 34. Robertson AE, Simmons DR (2013): The relationship between sensory  
637 sensitivity and autistic traits in the general population. *J Autism Dev Disord.*  
638 43: 775–784.
- 639 35. Baron-Cohen S, Wheelwright S, Hill J, Raste Y, Plumb I (2001): The “Reading  
640 the Mind in the Eyes” test revised version: A study with normal adults, and  
641 adults with Asperger syndrome or high-functioning autism. *J Child Psychol*  
642 *Psychiatry.* 42: 241–251.
- 643 36. Oakley BF, Brewer R, Bird G, Catmur C (2016): Theory of mind is not theory of  
644 emotion: A cautionary note on the Reading the Mind in the Eyes Test. *J*  
645 *Abnorm Psychol.* 125: 818.
- 646 37. Jenkinson M, Smith S (2001): A global optimisation method for robust affine  
647 registration of brain images. *Med Image Anal.* 5: 143–156.
- 648 38. Fischl B (2012): FreeSurfer. *Neuroimage.* 62: 774–781.
- 649 39. Essen V, C D, Glasser MF, Dierker DL, Harwell J, Coalson T (2012):  
650 Parcellations and Hemispheric Asymmetries of Human Cerebral Cortex Analyzed on  
651 Surface-Based Atlases. *Cereb Cortex.* 22: 2241–2262.
- 652 40. Taulu S, Simola J (2006): Spatiotemporal signal space separation method for  
653 rejecting nearby interference in MEG measurements. *Phys Med Biol.* 51:  
654 1759.
- 655 41. Oostenveld R, Fries P, Maris E, Schoffelen J-M (2010): FieldTrip: open source  
656 software for advanced analysis of MEG, EEG, and invasive  
657 electrophysiological data. *Comput Intell Neurosci.* 2011. 1.
- 658 42. Van Veen BD, van Drongelen W, Yuchtman M, Suzuki A (1997): Localization of  
659 brain electrical activity via linearly constrained minimum variance spatial  
660 filtering. *IEEE Trans Biomed Eng.* 44: 867–880.
- 661 43. Glasser MF, Coalson TS, Robinson EC, Hacker CD, Harwell J, Yacoub E, *et al.*  
662 (2016): A multi-modal parcellation of human cerebral cortex. *Nature.* 536:  
663 171–178.
- 664 44. Hoogenboom N, Schoffelen J-M, Oostenveld R, Parkes LM, Fries P (2006):  
665 Localizing human visual gamma-band activity in frequency, time and  
666 space. *Neuroimage.* 29: 764–773.
- 667 45. Dhamala M, Rangarajan G, Ding M (2008): Analyzing information flow in brain  
668 networks with nonparametric Granger causality. *Neuroimage.* 41: 354–362.
- 669 46. Granger CW (1969): Investigating causal relations by econometric models and  
670 cross- spectral methods. *Econom J Econom Soc.* 424–438.
- 671 47. Maris E, Oostenveld R (2007): Nonparametric statistical testing of EEG- and  
672 MEG-data. *J Neurosci Methods.* 164: 177–190.
- 673 48. Özkurt TE, Schnitzler A (2011): A critical note on the definition of phase–  
674 amplitude cross-frequency coupling. *J Neurosci Methods.* 201: 438–443.
- 675 49. Cohen MX (2008): Assessing transient cross-frequency coupling in EEG data. *J*  
676 *Neurosci Methods.* 168: 494–499.
- 677 50. Muthukumaraswamy SD (2013): High-frequency brain activity and muscle  
678 artifacts in MEG/EEG: a review and recommendations. *Front Hum Neurosci.*  
679 7.
- 680 51. Spyropoulos G, Bosman CA, Fries P (2018): A theta rhythm in macaque visual  
681 cortex and its attentional modulation. *Proc Natl Acad Sci.* 201719433.
- 682 52. Capotosto P, Babiloni C, Romani GL, Corbetta M (2009): Frontoparietal cortex  
683 controls spatial attention through modulation of anticipatory alpha rhythms. *J*

- 684           *Neurosci.* 29: 5863–5872.
- 685 53. Palva S, Palva JM (2011): Functional roles of alpha-band phase synchronization  
686       in local and large-scale cortical networks. *Front Psychol.* 2: 204.
- 687 54. VanRullen R, Koch C (2003): Visual Selective Behavior Can Be Triggered by a  
688       Feed- Forward Process. *J Cogn Neurosci.* 15: 209–217.
- 689 55. Mottron L, Dawson M, Soulières I, Hubert B, Burack J (2006): Enhanced  
690       perceptual functioning in autism: An update, and eight principles of autistic  
691       perception. *J Autism Dev Disord.* 36: 27–43.
- 692 56. Jobs EN, Falck-Ytter T, Bölte S (2018): Local and Global Visual Processing in 3-  
693       Year- Olds With and Without Autism. *J Autism Dev Disord.* 1–9.
- 694 57. Berman JI, Liu S, Bloy L, Blaskey L, Roberts TP, Edgar JC (2015): Alpha-to-  
695       gamma phase-amplitude coupling methods and application to autism  
696       spectrum disorder. *Brain Connect.* 5: 80–90.
- 697 58. Onslow ACE, Jones MW, Bogacz R (2014): A canonical circuit for generating  
698       phase-       amplitude coupling. *PloS One.* 9: e102591.
- 699 59. Voytek B, Knight RT (2015): Dynamic network communication as a unifying  
700       neural basis for cognition, development, aging, and disease. *Biol Psychiatry.*  
701       77: 1089–1097.
- 702 60. Hahamy A, Behrmann M, Malach R (2015): The idiosyncratic brain: distortion of  
703       spontaneous connectivity patterns in autism spectrum disorder. *Nat Neurosci.*  
704       18: 302–309.
- 705 61. Mamashli F, Khan S, Bharadwaj H, Losh A, Pawlyszyn SM, Hämäläinen MS,  
706       Kenet T (2018): Maturational trajectories of local and long-range functional  
707       connectivity in autism during face processing. *Hum Brain Mapp.*
- 708 62. Friston K (2005): A theory of cortical responses. *Philos Trans R Soc Lond B Biol*  
709       *Sci.* 360: 815–836.
- 710 63. Palmer CJ, Lawson RP, Hohwy J (2017): Bayesian approaches to autism:  
711       Towards volatility, action, and behavior. *Psychological bulletin.* 143: 521.
- 712 64. Pellicano E, Burr D (2012): When the world becomes “too real”: a Bayesian  
713       explanation of autistic perception. *Trends Cogn Sci.* 16: 504–510.
- 714 65. Ashwin E, Ashwin C, Rhydderch D, Howells J, Baron-Cohen S (2009): Eagle-  
715       eyed visual acuity: an experimental investigation of enhanced perception in  
716       autism. *Biol Psychiatry.* 65: 17–21.
- 717 66. Loth E, Murphy DG, Spooren W (2016): Defining precision medicine approaches  
718       to autism spectrum disorders: concepts and challenges. *Front Psychiatry.* 7:  
719       188.
- 720 67. Gohel B, Lim S, Kim M-Y, Kwon H, Kim K (2017): Approximate Subject Specific  
721       Pseudo MRI from an Available MRI Dataset for MEG Source Imaging. *Front*  
722       *Neuroinformatics.* 11: 50.
- 723 68. Nolte G (2003): The magnetic lead field theorem in the quasi-static  
724       approximation and its use for magnetoencephalography forward calculation in  
725       realistic volume conductors. *Phys Med Biol.* 48: 3637–3652.
- 726 69. Litvak V, Mattout J, Kiebel S, Phillips C, Henson R, Kilner J, *et al.* (2011): EEG  
727       and MEG data analysis in SPM8. *Comput Intell Neurosci.* 2011.
- 728 70. Van Essen DC, Ugurbil K, Auerbach E, Barch D, Behrens TEJ, Bucholz R, *et al.*  
729       (2012): The Human Connectome Project: a data acquisition perspective.  
730       *Neuroimage.* 62: 2222–2231.
- 731 71. Canolty RT, Edwards E, Dalal SS, Soltani M, Nagarajan SS, Kirsch HE, *et al.*  
732       (2006): High gamma power is phase-locked to theta oscillations in human  
733       neocortex. *Science.* 313: 1626–1628.

## Supplementary Methods

### **Participant Exclusion**

MEG data from a further 9 participants was collected but excluded, due to: intolerance to MEG (2 ASD); movement over 0.5cm (2 ASD, 2 control); metal artefacts (1 ASD, 1 control); AQ score over 30 (1 control).

### **MEG Acquisition**

MEG data were acquired using a 306-channel Neuromag MEG system (Vectorview, Elekta, Finland) made up of 102 triplets of two orthogonal planar gradiometers and one magnetometer. All recordings were performed inside a magnetically shielded room at a sampling rate of 1000Hz. Five head position indicator (HPI) coils were applied for continuous head position tracking, and visualised post-acquisition using an in-house Matlab script. For MEG-MRI coregistration purposes three fiducial points, the locations of the HPI coils and 300-500 points from the head surface were acquired using the integrated Polhemus Fastrak digitizer. Visual stimuli were presented on a screen located 86cm from participants (resulting in 2 cycles/degree for the visual grating), and auditory feedback through MEG-compatible earphones.

### **Structural MRI**

A structural T1 brain scan was acquired for source reconstruction using a Siemens MAGNETOM Trio 3T scanner with a 32-channel head coil (TE=2.18ms, TR=2300ms, TI=1100ms, flip angle=9°, 192 or 208 slices depending on head size, voxel-size = 0.8x0.8x0.8cm).

### **MEG-MRI Coregistration and 2D Cortical Mesh Construction**

MEG data were co-registered with participants MRI structural scan by matching the digitised head-shape data with surface data from the structural scan (38). Two control participants did not complete a T1 structural MRI and therefore a pseudo-MRI was used, see (70) for full procedure. The aligned MRI-MEG images were used to create a forward model based on a single-shell description of the inner surface of the skull (71), using the segmentation function in SPM8 (72). The cortical mantle was then extracted to create a cortical mesh, using Freesurfer v5.3 (39), and registered to a standard fs\_LR mesh, based on the Conte69 brain (Van Essen 2012), using an interpolation algorithm from the Human Connectome Project (Van Essen et al., 2012; instructions here: <https://goo.gl/3HYA3L>). Finally, the mesh was downsampled to 4002 vertices per hemisphere.

### **PAC**

The mean vector length approach estimates PAC from a signal with length  $N$ , by combining phase ( $\phi$ ) and amplitude information to create a complex-valued signal:  $f_a e^{i(\phi_{f_p})}$  (74), in which each vector corresponds to a certain time-point ( $n$ ). If the resulting probability distribution function is non-uniform, this suggests a coupling between  $f_p$  and  $f_a$ , which can be quantified by taking the length of the average vector. As recommended by Özkurt & Schnitzler (2011) a normalisation factor was also applied corresponding to the power of  $f_a$  (50).

781

$$MI = \frac{1}{\sqrt{N}} \frac{\left| \frac{1}{N} \sum_{n=1}^N f_a(n) e^{i(\phi_{f_p}(n))} \right|}{\sqrt{\frac{1}{N} \sum_{n=1}^N f_a(n)^2}}$$

782

783

784

## Supplementary Figures

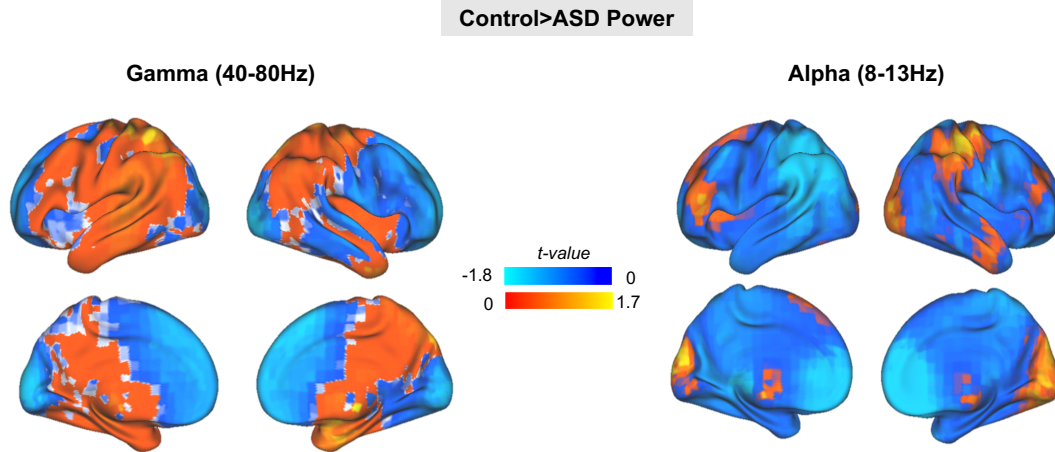

785

786

787 **Figure S1:** Brain-wide statistical comparison of control > ASD source-space  
 788 oscillatory power for gamma (40-80Hz) and alpha (8-13Hz). There were no  
 789 significant differences in either alpha or gamma power between groups ( $p > .05$ ,  
 790 corrected for multiple comparisons).  
 791

791

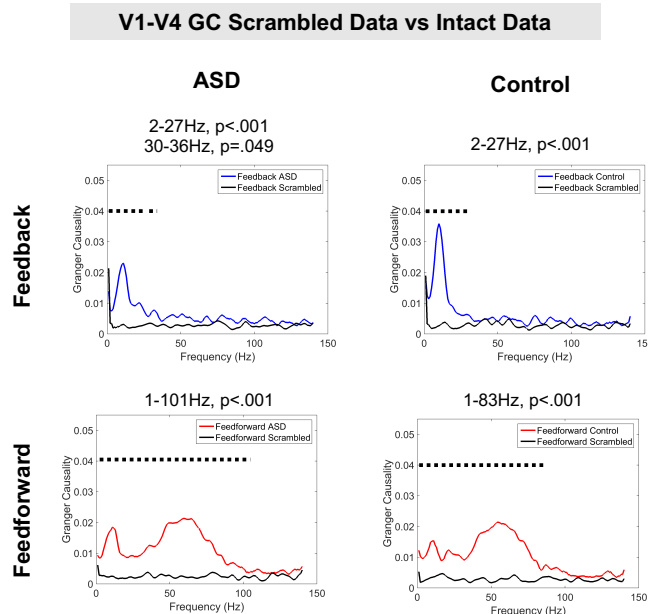

792

793

794 **Figure S2:** V1-V4 feedforward and V4-V1 Granger Causality (GC) values were  
 795 statistically compared with GC values computed using scrambled V1/V4 data with  
 796 same spectral properties as the intact data. On each sub-figure the black dotted line

797 signifies intact GC values significantly greater than scrambled GC values ( $p < .05$ ).  
 798 The exact frequency range and p-values are listed at the top of each plot.  
 799

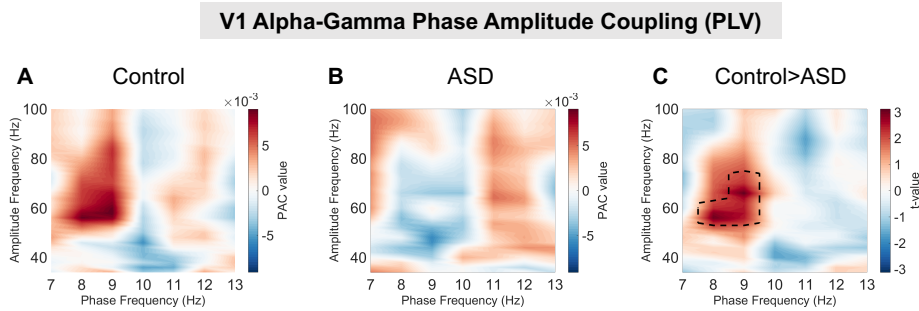

800  
 801  
 802  
 803  
 804  
 805  
 806  
 807

**Figure S3:** Alpha-Gamma Phase Amplitude Coupling in V1 was quantified using an alternative PLV approach (Cohen, 2008). (A-B) Both control and ASD group results show similar patterns of PAC changes compared with Figure 3A-B. (C) Statistical comparison of control>ASD indicated one positive cluster of increased PAC ( $p = .037$ ) from 54-74Hz amplitude and 8-9Hz phase, replicating Figure 3C.

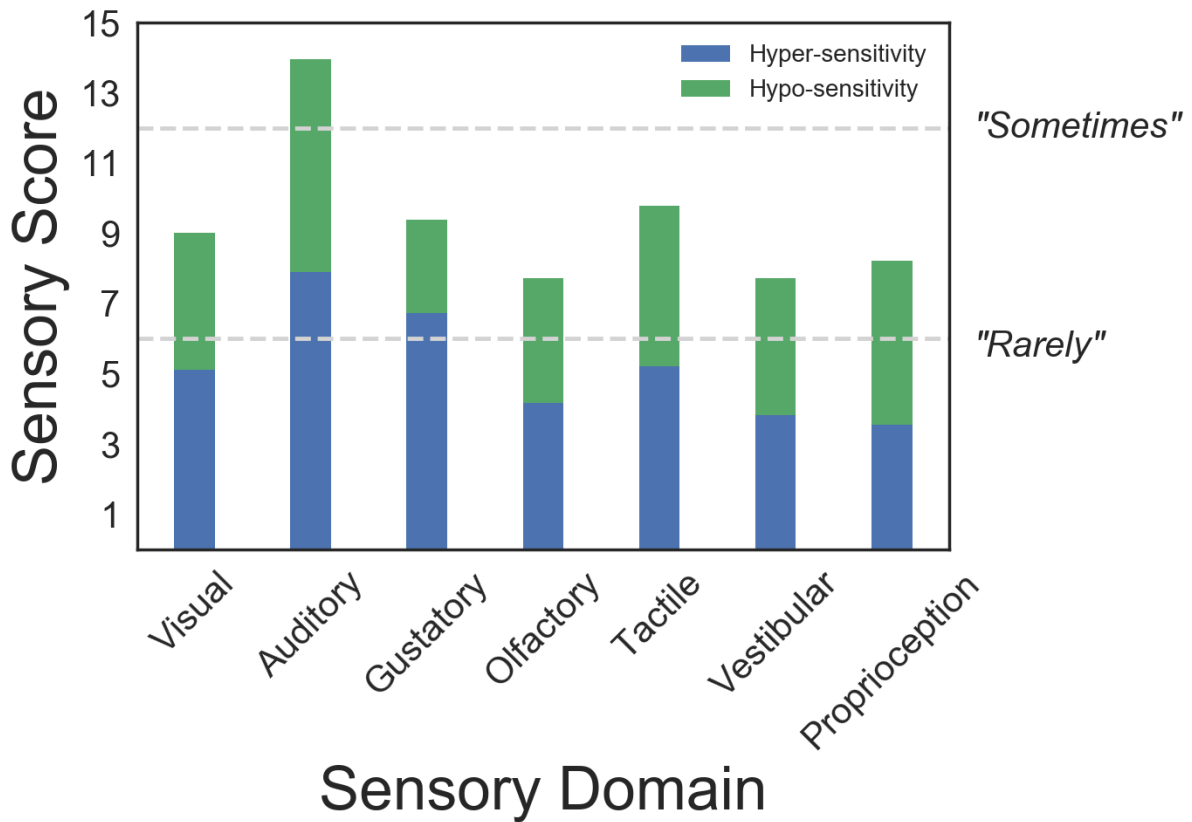

808  
 809  
 810  
 811  
 812  
 813  
 814  
 815

**Figure S4:** Responses to the Glasgow Sensory Questionnaire were grouped by sensory domain (maximum score = 20) and hypo- / hyper-sensitivity (green and blue bars respectively). Our data show a heterogeneous pattern of sensory symptoms, with mixture of hypo- and hyper-sensitivities. Visual symptoms scored 9.0/20 corresponding to questionnaire answers between “Rarely” and “Sometimes”. Auditory sensory symptoms were higher than for other modalities.
